# Supplementary material for: Provider Bias in prescribing opioid analgesics: a study of electronic medical Records at a Hospital Emergency Department
Source: PubMed Central journal article supplement (PMC8344207; doi:10.1186/s12889-021-11551-9), 2021-08-06

# Histogram of Previous Opioid Prescriptions

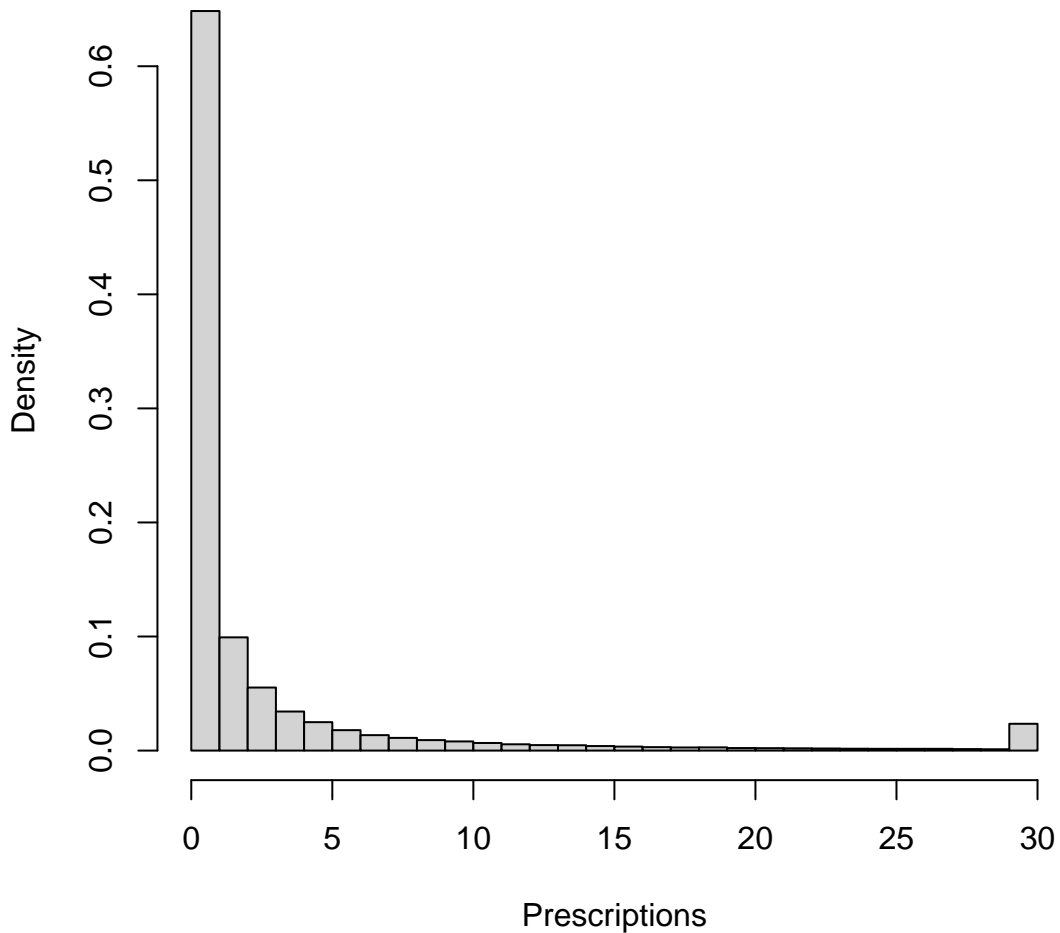

Supplement: 12889_2021_11551_MOESM3_ESM.pdf [file 12889_2021_11551_MOESM3_ESM.pdf]
